# Supplementary material
Source: Springer Nature journal article supplement (https://www.springermedizin.de/resource/supplementary/12936_2013_3064_MOESM2_ESM.pdf/9545022)
Supplement: MOESM2 [file 9545022]

# Unit Costs (per tablet) of Artemether + Lumefantrine - FDC over Time

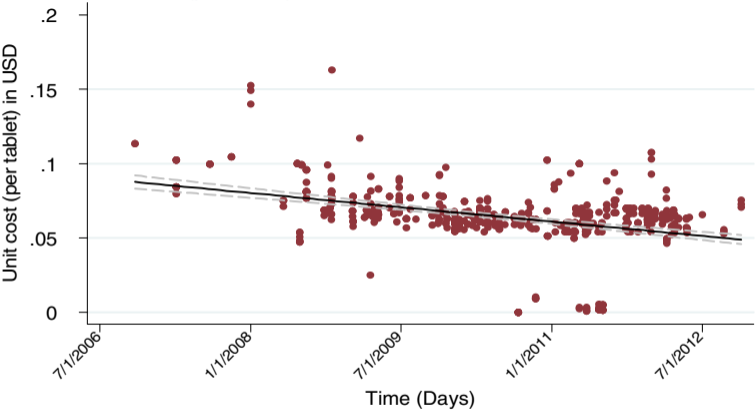

• Unit Cost    - - - - Fitted Trend 95% CI    — Fitted trend

Coef.=-.000 (P<.001)

R-squared=.160
